# Supplementary material
Source: publisher figshare collection journal article supplement (https://brill.figshare.com/articles/dataset/_/11347007)
Supplement: Supplementary file 1 [file 1]

## **Does nocturnal activity prolong gecko longevity?**

Gavin Stark<sup>a,\*</sup>, Rachel Schwarz<sup>a</sup> and Shai Meiri<sup>a,b</sup>

*<sup>a</sup>School of Zoology, Faculty of Life sciences, Tel Aviv University, Tel Aviv, Israel*

*<sup>b</sup>The Steinhardt Museum of Natural History, Tel Aviv University, Tel Aviv, Israel*

\*Corresponding author. E-mail: gavinstark89@gmail.com

### **Supplementary material**
